# Supplementary material for: Tunable luminescence in Eu3+/Sm3+ single-doped LuNbO4 for optical thermometry and anti-counterfeiting
Source: Royal Society of Chemistry journal article supplement (doi:10.1039/d3tc01780j), 2023-01-01
Supplement: d3tc01780j1.pdf [file d3tc01780j1.pdf]

## Supporting Information

### **Tunable luminescence in Eu<sup>3+</sup>/Sm<sup>3+</sup> single-doped LuNbO<sub>4</sub> for optical thermometry and anti-counterfeiting**

Yuqi Chen <sup>a</sup>, Yu Xue <sup>a</sup>, Qinan Mao <sup>a</sup>, Lang Pei <sup>a</sup>, Yang Ding <sup>a</sup>, Yiwen Zhu <sup>a</sup>, Meijiao Liu <sup>b</sup>,  
Jiasong Zhong <sup>a\*</sup>

<sup>a</sup> Center of Advanced Optoelectronic Materials, College of Materials and Environmental Engineering, Hangzhou  
Dianzi University, Hangzhou 310018, China

<sup>b</sup> Key Laboratory of Surface & Interface Science of Polymer Materials of Zhejiang Province, School of Chemistry  
and Chemical Engineering, Zhejiang Sci-Tech University, Hangzhou 310018, China

Corresponding authors:

E-mail: [jiasongzhong@hdu.edu.cn](mailto:jiasongzhong@hdu.edu.cn) (J. Zhong)

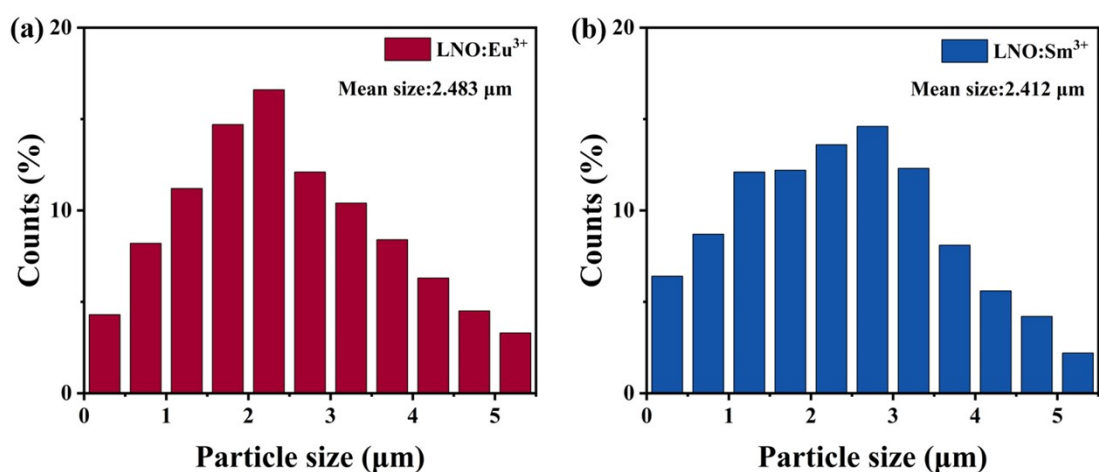

Fig. S1 The average size of (a) LNO:0.05Eu<sup>3+</sup>, (b) LNO:0.05Sm<sup>3+</sup> phosphors.

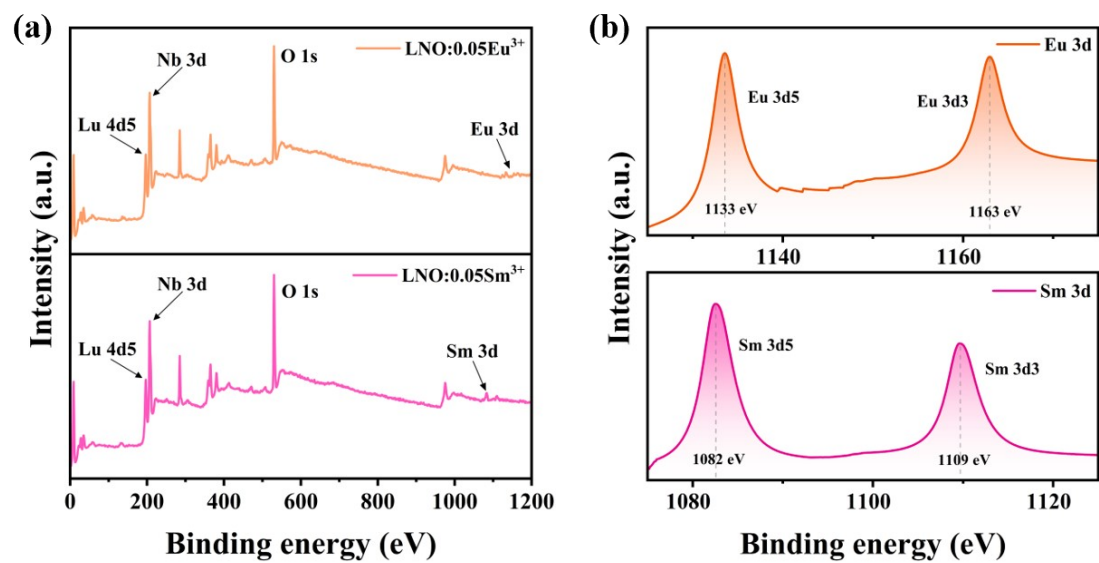

Fig. S2 (a) XPS of LNO:0.05 Eu<sup>3+</sup>/Sm<sup>3+</sup> phosphors. (b) Magnified XPS spectra of Eu 3d and Sm 3d electron for LNO:0.05 Eu<sup>3+</sup>/Sm<sup>3+</sup> phosphors.

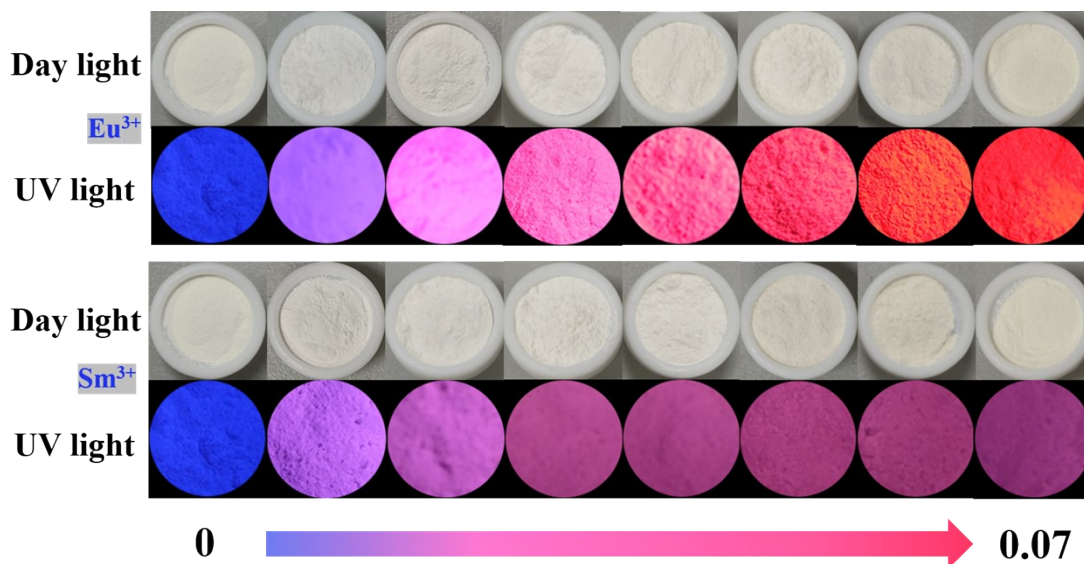

Fig. S3 luminescence photographs of the  $\text{LNO}:x\text{Eu}^{3+}/y\text{Sm}^{3+}$  ( $0 \leq x \leq 0.07$ ,  $0 \leq y \leq 0.07$ ) upon the daylight or UV lamp ( $\lambda_{\text{ex}}=261$  nm).

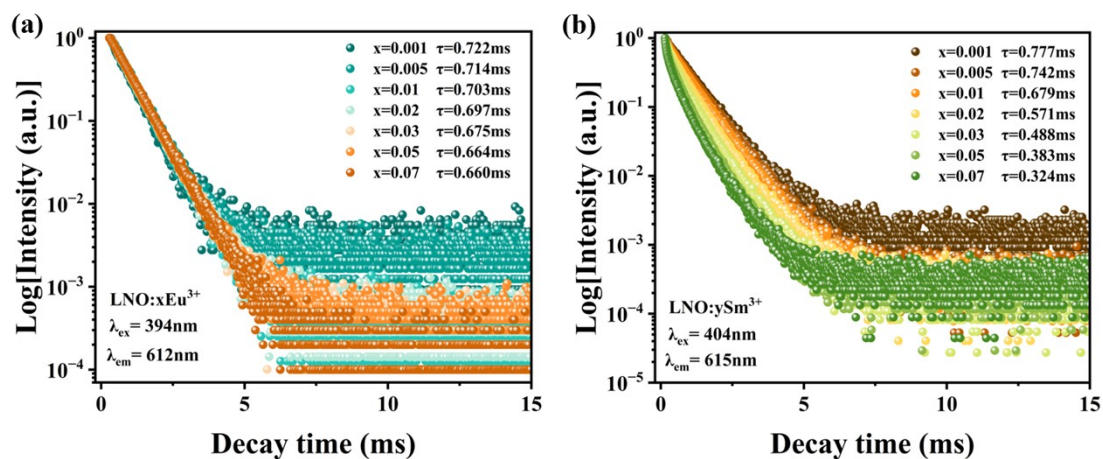

Fig. S4 The PL decay curves of the (a)  $\text{LNO}:0.05\text{Eu}^{3+}$  ( $\lambda_{\text{ex}}=394$  nm,  $\lambda_{\text{em}}=612$  nm), (b)  $\text{LNO}:0.05\text{Sm}^{3+}$  ( $\lambda_{\text{ex}}=404$  nm,  $\lambda_{\text{em}}=615$  nm) phosphors.

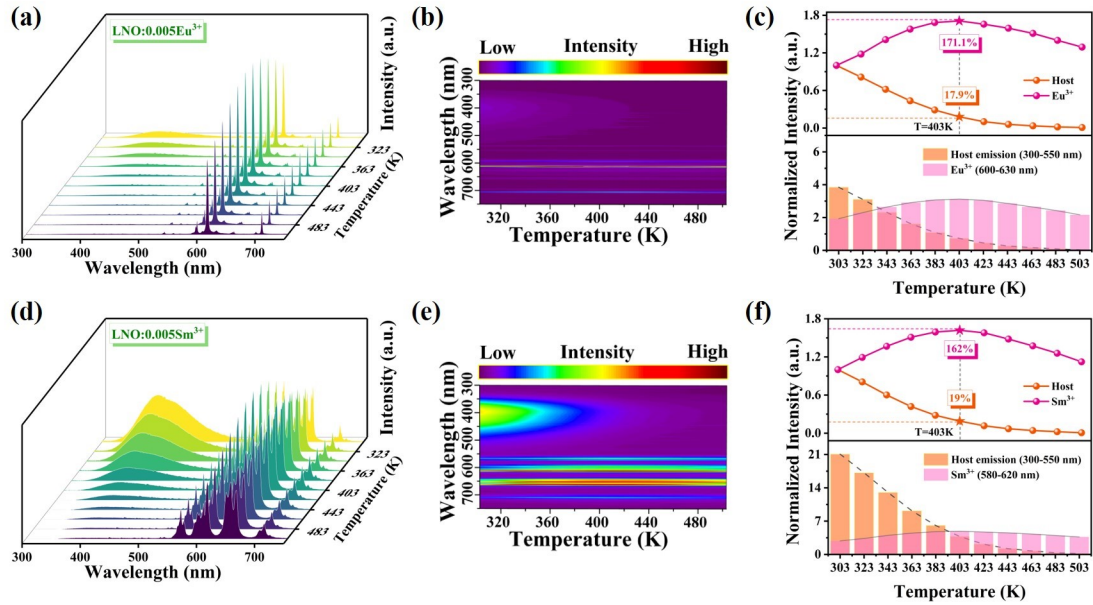

**Fig. S5** The temperature-dependence PL spectra upon 261 nm excitation and corresponding contour map of thermal evolution PL spectra and host, Eu<sup>3+</sup>/Sm<sup>3+</sup> normalized emission at various temperatures images of (a-c) LNO:0.005Eu<sup>3+</sup>, (d-f) LNO:0.005Sm<sup>3+</sup>.

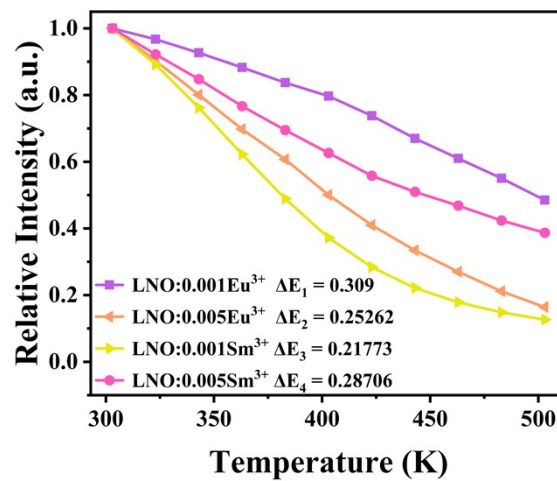

**Fig. S6** The integrated PL intensities of the LNO: $x$ Eu<sup>3+</sup> ( $x=0.001, 0.005$ ) and LNO: $y$ Sm<sup>3+</sup> ( $y=0.001, 0.005$ ) and the corresponding activation energy.

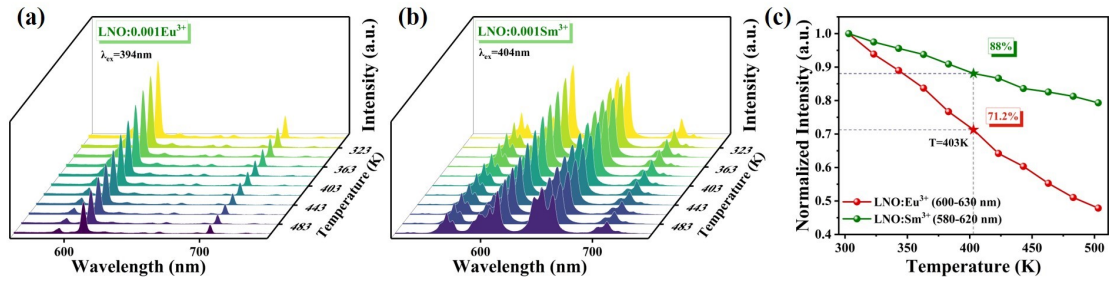

**Fig. S7** (a-b) The temperature-dependence PL spectra of LNO:0.001Eu<sup>3+</sup>/Sm<sup>3+</sup> under the excitation of 394 and 404 nm, respectively. (c) Integrated emission intensity of Eu<sup>3+</sup>/Sm<sup>3+</sup> for LNO:0.001Eu<sup>3+</sup>/Sm<sup>3+</sup> phosphors.

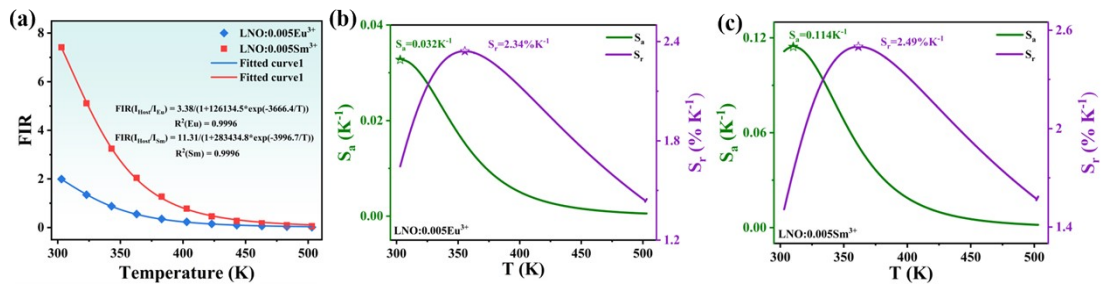

**Fig. S8** (a) The fitting curve of temperature-dependent FIR ( $I_{\text{host}}/I_{\text{Eu}}$  and  $I_{\text{host}}/I_{\text{Sm}}$ ). (b-c) The  $S_a$ ,  $S_r$  values with different temperatures for LNO:0.005Eu<sup>3+</sup>/Sm<sup>3+</sup>, respectively.

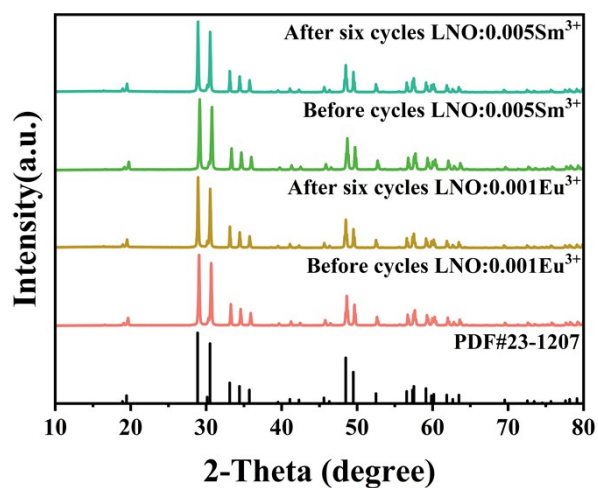

**Fig. S9** XRD patterns of obtained LNO:0.001Eu<sup>3+</sup> and LNO:0.005Sm<sup>3+</sup> phosphors before and after six cycles.

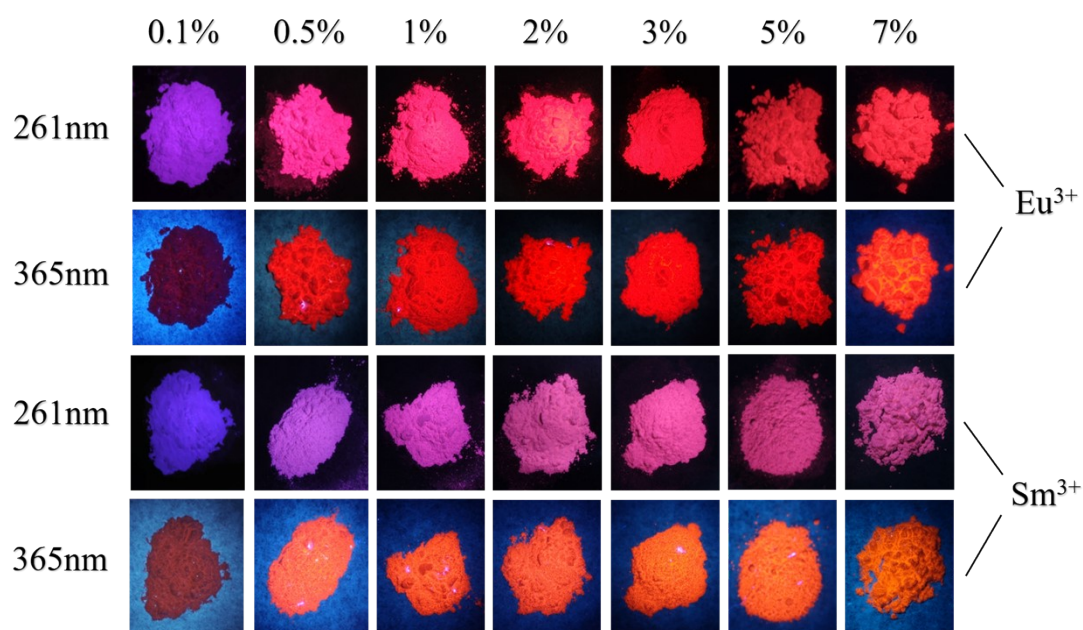

**Fig. S10** Photographs of the LNO: xEu<sup>3+</sup>/ySm<sup>3+</sup> samples upon 261 and 365 nm light excitation with different Eu<sup>3+</sup>/Sm<sup>3+</sup> doping concentrations.

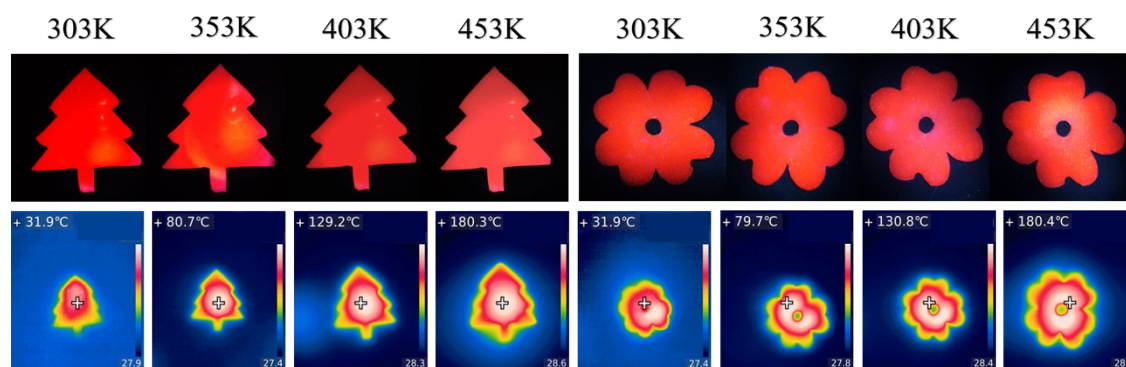

**Fig. S11** The photographs of LNO:0.005Eu<sup>3+</sup>/Sm<sup>3+</sup>-PDMS films upon 365 nm excitations from 303 to 453K and the corresponding thermographs.

**Table S1** Rietveld refinement data of the LNO: $x\text{Eu}^{3+}$  ( $0 \leq x \leq 0.07$ ) samples

|                         | LNO: $x\text{Eu}^{3+}$ |           |           |          |          |          |          |          |
|-------------------------|------------------------|-----------|-----------|----------|----------|----------|----------|----------|
|                         | $x=0$                  | $x=0.001$ | $x=0.005$ | $x=0.01$ | $x=0.02$ | $x=0.03$ | $x=0.05$ | $x=0.07$ |
| $a$ ,<br>$\text{\AA}$   | 5.2319                 | 5.2329    | 5.2341    | 5.2351   | 5.238    | 5.2355   | 5.2412   | 5.2423   |
| $b$ ,<br>$\text{\AA}$   | 10.831                 | 10.834    | 10.8359   | 10.8376  | 10.8402  | 10.8467  | 10.8512  | 10.8533  |
| $c$ ,<br>$\text{\AA}$   | 5.0441                 | 5.0449    | 5.0461    | 5.047    | 5.0481   | 5.0492   | 5.0504   | 5.052    |
| $\alpha$                | 90                     | 90        | 90        | 90       | 90       | 90       | 90       | 90       |
| $\beta$                 | 94.4184                | 94.4181   | 94.4147   | 94.412   | 94.41    | 94.398   | 94.391   | 94.387   |
| $\gamma$                | 90                     | 90        | 90        | 90       | 90       | 90       | 90       | 90       |
| $V$ ,<br>$\text{\AA}^3$ | 284.984                | 285.1985  | 285.3354  | 285.4969 | 285.8226 | 286.1728 | 286.3305 | 286.5904 |
| $R_{wp}$                | 8.31                   | 8.29      | 7.919     | 8.498    | 7.801    | 7.89     | 7.86     | 7.834    |
| $R_p$                   | 6.353                  | 6.365     | 6.158     | 6.54     | 6.048    | 5.861    | 6.04     | 5.82     |
| $\chi^2$                | 1.327                  | 1.852     | 1.734     | 1.871    | 1.667    | 1.634    | 1.67     | 1.709    |

**Table S2** Rietveld refinement data of the LNO: $y\text{Sm}^{3+}$  ( $0 \leq x \leq 0.07$ ) samples

|                         | LNO: $y\text{Sm}^{3+}$ |           |           |          |          |          |          |          |
|-------------------------|------------------------|-----------|-----------|----------|----------|----------|----------|----------|
|                         | $y=0$                  | $y=0.001$ | $y=0.005$ | $y=0.01$ | $y=0.02$ | $y=0.03$ | $y=0.05$ | $y=0.07$ |
| $a$ ,<br>$\text{\AA}$   | 5.2319                 | 5.23495   | 5.23517   | 5.2371   | 5.2399   | 5.2401   | 5.2421   | 5.2439   |
| $b$ ,<br>$\text{\AA}$   | 10.831                 | 10.8372   | 10.8378   | 10.8425  | 10.8478  | 10.849   | 10.8519  | 10.8581  |
| $c$ ,<br>$\text{\AA}$   | 5.0441                 | 5.04694   | 5.04695   | 5.04809  | 5.0475   | 5.0486   | 5.0499   | 5.053    |
| $\alpha$                | 90                     | 90        | 90        | 90       | 90       | 90       | 90       | 90       |
| $\beta$                 | 94.4184                | 94.4178   | 94.4167   | 94.4158  | 94.41    | 94.4060  | 94.4050  | 94.4010  |
| $\gamma$                | 90                     | 90        | 90        | 90       | 90       | 90       | 90       | 90       |
| $V$ ,<br>$\text{\AA}^3$ | 284.984                | 285.4737  | 285.501   | 285.7983 | 286.0594 | 286.2905 | 286.5213 | 286.8672 |
| $R_{wp}$                | 8.31                   | 7.384     | 6.52      | 6.186    | 7.014    | 6.122    | 7.472    | 7.749    |
| $R_p$                   | 6.353                  | 5.775     | 5.007     | 4.788    | 5.469    | 4.708    | 5.390    | 5.527    |
| $\chi^2$                | 1.327                  | 1.476     | 1.311     | 1.267    | 1.47     | 1.33     | 1.479    | 1.669    |



**Table S3** The EDS elemental analysis of LNO:0.05Eu<sup>3+</sup> sample

| Sample                   | Element | Weight(%) | Atomic(%) | Error(%) |
|--------------------------|---------|-----------|-----------|----------|
| LNO:0.05Eu <sup>3+</sup> | Lu      | 19.72     | 3.13      | 5.56     |
|                          | Nb      | 27.79     | 8.29      | 5.47     |
|                          | O       | 50.94     | 88.3      | 9.62     |
|                          | Eu      | 1.54      | 0.28      | 14.54    |

**Table S4** The EDS elemental analysis of LNO:0.05Sm<sup>3+</sup> sample

| Sample                   | Element | Weight(%) | Atomic(%) | Error(%) |
|--------------------------|---------|-----------|-----------|----------|
| LNO:0.05Sm <sup>3+</sup> | Lu      | 31.96     | 5.86      | 3.84     |
|                          | Nb      | 24.69     | 8.53      | 5.96     |
|                          | O       | 42.59     | 85.45     | 9.69     |
|                          | Sm      | 0.76      | 0.16      | 23.6     |

**Table S5** Temperature sensing properties based on FIR technology of different phosphors

| Phosphors | $\lambda_{ex}$<br>(nm) | Temperature<br>range (K) | S <sub>a</sub><br>(K <sup>-1</sup> ) | S <sub>r</sub><br>(%K <sup>-1</sup> ) | Ref. |
|-----------|------------------------|--------------------------|--------------------------------------|---------------------------------------|------|
|-----------|------------------------|--------------------------|--------------------------------------|---------------------------------------|------|

|                                                                                                           |     |         |        |       |           |
|-----------------------------------------------------------------------------------------------------------|-----|---------|--------|-------|-----------|
| CaNb <sub>2</sub> O <sub>6</sub> :Pr <sup>3+</sup>                                                        | 270 | 303-523 | 0.0049 | 2.25  | [1]       |
| Y <sub>0.985</sub> Nb <sub>0.8</sub> Ta <sub>0.2</sub> O <sub>4</sub> :Bi <sup>3+</sup> ,Eu <sup>3+</sup> | 305 | 303-523 | 0.086  | 1.8   | [2]       |
| NaLuO <sub>4</sub> :Eu <sup>3+</sup> @g-C <sub>3</sub> N <sub>4</sub>                                     | 394 | 303-503 | 0.0057 | 0.455 | [3]       |
| LuNbO <sub>4</sub> :Pr <sup>3+</sup> , Tb <sup>3+</sup>                                                   | 305 | 283-493 | 0.024  | 1.26  | [4]       |
| Ba <sub>2</sub> LaNbO <sub>6</sub> :Mn <sup>4+</sup> , Eu <sup>3+</sup>                                   | 396 | 303-523 | 0.069  | 2.08  | [5]       |
| Ca <sub>3</sub> LiMgV <sub>3</sub> O <sub>12</sub> :Sm <sup>3+</sup>                                      | 332 | 303-513 | 9.11   | 1.99  | [6]       |
| Ca <sub>2</sub> MgWO <sub>6</sub> :Er <sup>3+</sup> ,Yb <sup>3+</sup>                                     | 980 | 303-573 | 0.82   | 0.92  | [7]       |
| LuNbO <sub>4</sub> :0.001Eu <sup>3+</sup>                                                                 | 261 | 303-503 | 0.18   | 2.45  | This work |
| LuNbO <sub>4</sub> :0.005Sm <sup>3+</sup>                                                                 | 261 | 303-503 | 0.114  | 2.49  | This work |

## Reference

- [1] Y. Wang, N. Guo, Y. Xin, J. Li, R. Ou Yang, B. Shao and Y. Miao, *Dalton Trans.*, 2021, **50**, 7026-7040.
- [2] Q. Ma, N. Guo, Y. Xin and B. Shao, *Inorg. Chem. Front.*, 2021, **8**, 4072-4085.
- [3] P. Du, J. Tang, W. Li, and L. Luo, *Chem. Eng. J.*, 2021, **406**, 127165.
- [4] Y. Wu, H. Suo, X. Zhao, Z. Zhou, and C. Guo, *Inorg. Chem. Front.*, 2018, **5**, 2456-2461.
- [5] P. Wang, J. Mao, L. Zhao, B. Jiang, C. Xie, Y. Lin, F. Chi, M. Yin and Chen, Y. *Dalton Trans.*, 2019, **48**, 10062-10069.
- [6] J. Chen, J. Chen, W. Zhang, S. Xu, L. Chen and H. Guo, *Ceram. Int.*, 2023, **49**, 16252-16259.
- [7] Y. Jiang, Y. Tong, S. Chen, W. Zhang, F. Hu, R. Wei, and H. Guo, *Chem. Eng. J.*, 2021, **413**, 127470
